# Supplementary material
Source: Springer Nature journal article supplement (https://www.springermedizin.de/resource/supplementary/12958_2010_752_MOESM5_ESM.pdf/9568402)

**AdipoR1 mRNA expression /  
Reference Gene mRNA expressions  
(Fold over control)**

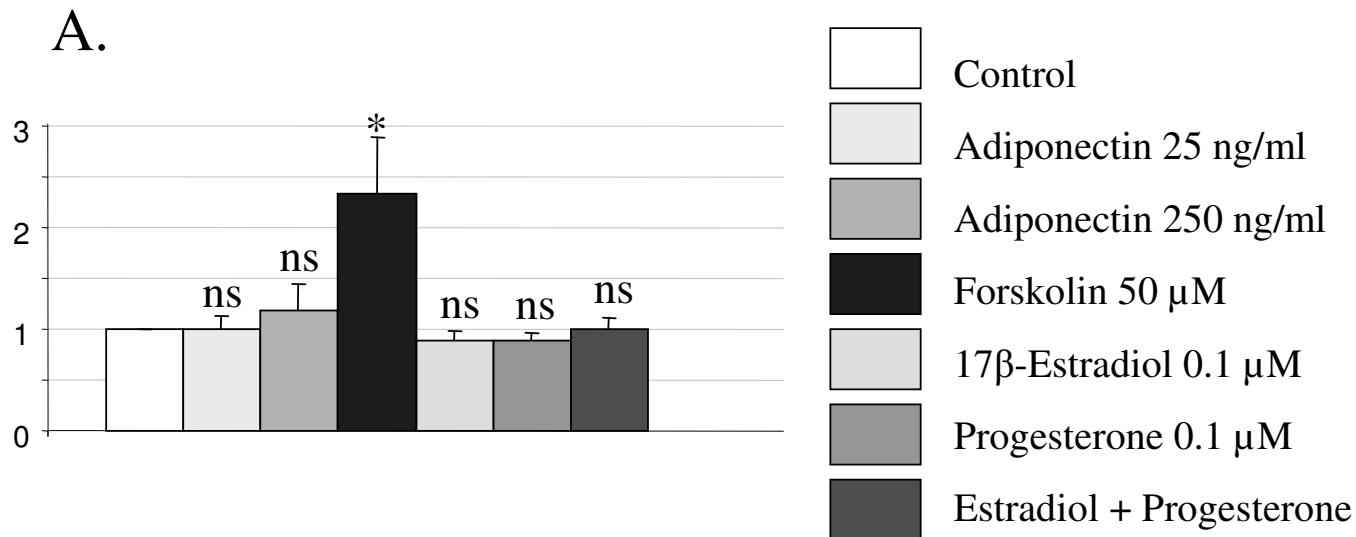

**AdipoR2 mRNA expression /  
Reference Gene mRNA expressions  
(Fold over control)**

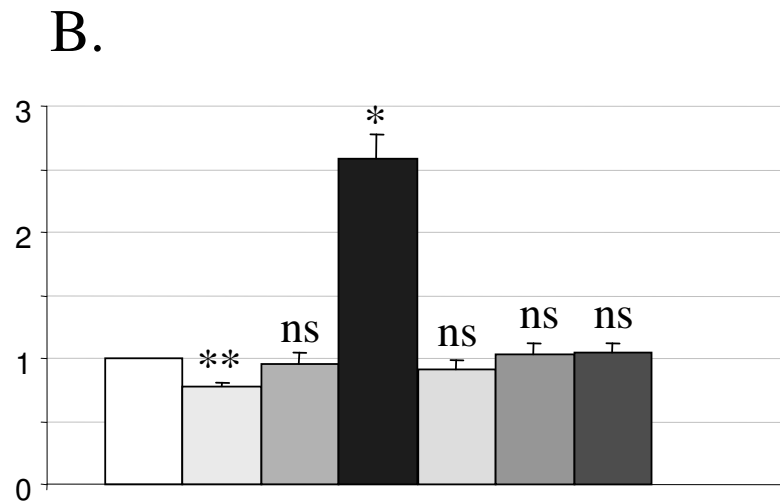

Supplement: MOESM5 [file 9568402]
